# Supplementary material for: A nest-like Ni@Ni1.4Co1.6S2 electrode for flexible high-performance rolling supercapacitor device design
Source: Royal Society of Chemistry journal article supplement (doi:10.1039/c5ta06265a), 2015-01-01
Supplement: c5ta06265a1.pdf [file c5ta06265a1.pdf]

## Nest-like Ni@Ni<sub>1.4</sub>Co<sub>1.6</sub>S<sub>2</sub> Electrode for Flexible High-Performance

### Rolling Supercapacitors Device Design

Liwei Mi,<sup>a,\*</sup> Wutao Wei,<sup>a</sup> Shaobo Huang,<sup>a</sup> Shizhong Cui,<sup>a</sup> Wangxi Zhang,<sup>a</sup> Hongwei Hou<sup>b</sup> and Weihua Chen<sup>b,\*</sup>

**Method of preparing roll-up supercapacitor device:** For the assembly of roll-up cell, the positive electrode is the as-obtained nest-like flexible electrodes (20 cm×1.5 cm), the negative electrode is the active carbon electrode with the similar size of positive electrode, and the non-woven and 2 M KOH aqueous solution are diaphragm and electrolyte, respectively. The positive electrode, diaphragm, negative electrode and diaphragm were folded together in this order, wined up, putted into shell, and then injected electrolyte. So the roll-up supercapacitor device was successfully assembled.

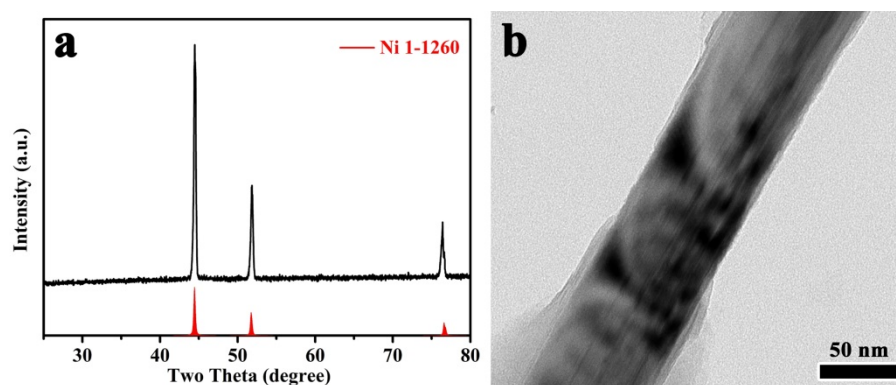

**Figure S1.** (a) XRD pattern of sample synthesized by the similar method of Ni@Co<sub>9</sub>S<sub>8</sub>, the difference is that the template is no longer Ni@Ni<sub>3</sub>S<sub>2</sub> but a piece of foam nickel (0.0305 g), which is to prove metal nickel no participate in the reaction during the replacement process. (b) TEM image of Ni<sub>3</sub>S<sub>2</sub> nanowires on the surface of nest-like Ni@Ni<sub>3</sub>S<sub>2</sub>.

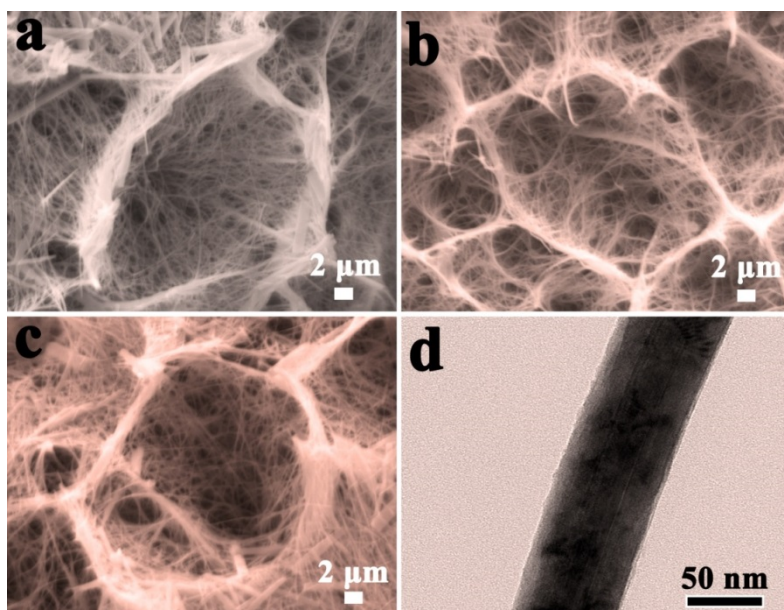

**Figure S2.** SEM images of (a) Co-1, (b) Co-2 and (c) Co-6. (d) TEM image of nanowire as the building block of nest-like materials on the surface of Co-4.

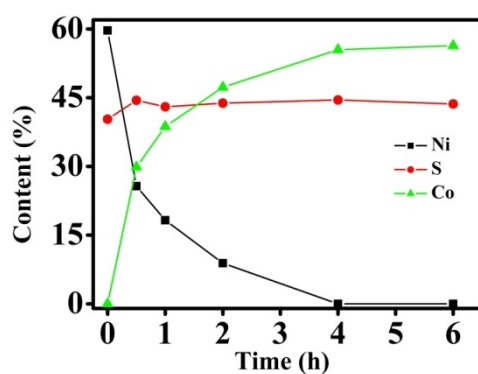

**Figure S3.** Curves of element ratio of S, Co, and Ni in Ni@Ni<sub>3</sub>S<sub>2</sub>, Ni@Ni<sub>1.4</sub>Co<sub>1.6</sub>S<sub>2</sub>, Ni@NiCo<sub>2</sub>S<sub>2</sub>, Ni@Ni<sub>0.5</sub>Co<sub>2.5</sub>S<sub>2</sub>, Ni@Co<sub>9</sub>S<sub>8</sub>, and Co-6, which were obtained by the EDX measure.

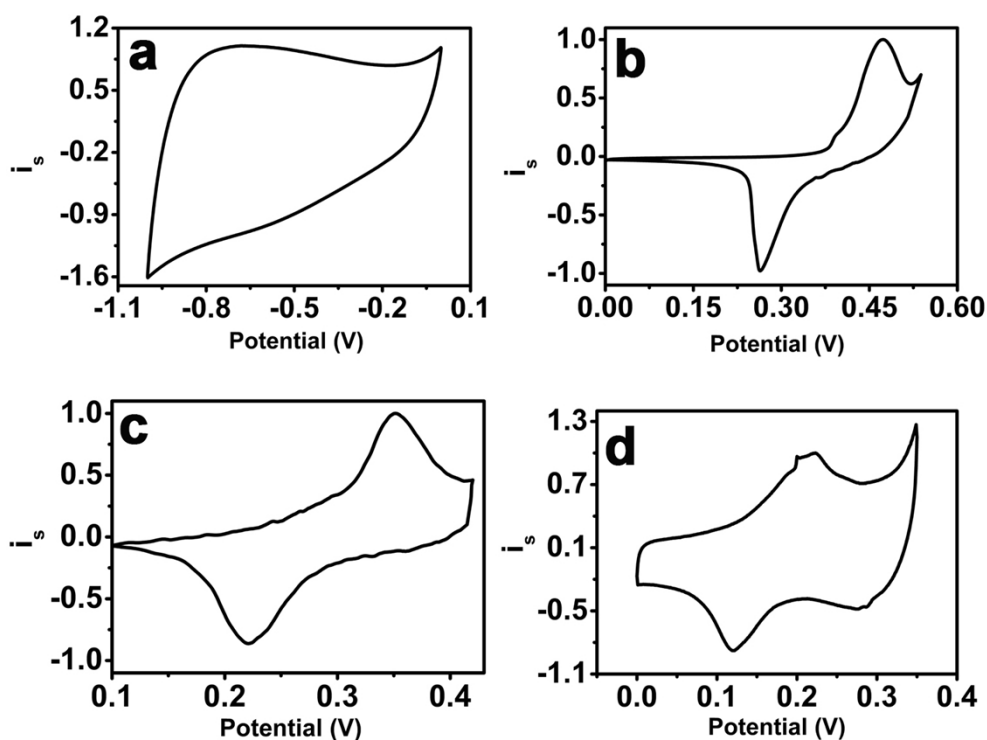

**Figure S4.** CV curves of active materials, Ni@Ni<sub>3</sub>S<sub>2</sub>, Ni@Ni<sub>1.4</sub>Co<sub>1.6</sub>S<sub>2</sub> and Ni@Co<sub>9</sub>S<sub>8</sub> in 3-electrode system (Work electrode: the as-obtained nest-like electrode materials, reference electrode: Hg/HgO electrode, and counter electrode: platinum electrode).

**Table S1.** The text results of EDX, XPS, ICP and AAS.

| Sample                                                | Atomic Ratio (Ni:Co) |           |           |           |
|-------------------------------------------------------|----------------------|-----------|-----------|-----------|
|                                                       | EDX                  | XPS       | ICP       | AAS       |
| Ni@Ni <sub>1.4</sub> Co <sub>1.6</sub> S <sub>2</sub> | 1.4: 1.6             | 1.37:1.63 | 1.49:1.51 | 1.42:1.58 |
| Ni@NiCo <sub>2</sub> S <sub>2</sub>                   | 1:2                  | —         | 1.02:1.98 | 1.03:1.97 |
| Ni@Ni <sub>0.5</sub> Co <sub>2.5</sub> S <sub>2</sub> | 0.5:2.5              | —         | 0.62:2.38 | 0.45:2.55 |

**Table S2.** The detailed data of energy density and power density of Ni@Ni<sub>3</sub>S<sub>2</sub>, Ni@Ni<sub>1.4</sub>Co<sub>1.6</sub>S<sub>2</sub>, Ni@NiCo<sub>2</sub>S<sub>2</sub>, and Ni@Co<sub>9</sub>S<sub>8</sub>//active carbon supercapacitor devices

| Sample                                                               | Data |      |      |      |      |      |      |       |       |
|----------------------------------------------------------------------|------|------|------|------|------|------|------|-------|-------|
| $E$ (W h kg <sup>-1</sup> )<br>Ni@Ni <sub>3</sub> S <sub>2</sub>     | 183  | 145  | 114  | 98   | 86   | 66   | 41   | 26    | 22    |
| $P_{av}$ (kW kg <sup>-1</sup> )<br>Ni@Ni <sub>3</sub> S <sub>2</sub> | 0.26 | 0.67 | 1.39 | 2.15 | 2.95 | 4.72 | 8.87 | 16.48 | 23.89 |
| $E$ (W h kg <sup>-1</sup> )                                          | 234  | 185  | 156  | 139  | 122  | 93   | 56   | 32    | 25    |

|                                                                                                       |      |      |      |      |      |      |      |      |       |
|-------------------------------------------------------------------------------------------------------|------|------|------|------|------|------|------|------|-------|
| Ni@Ni <sub>1.4</sub> Co <sub>1.6</sub> S <sub>2</sub>                                                 |      |      |      |      |      |      |      |      |       |
| <i>P<sub>av</sub></i> (kW kg <sup>-1</sup> )<br>Ni@Ni <sub>1.4</sub> Co <sub>1.6</sub> S <sub>2</sub> | 0.17 | 0.41 | 0.84 | 1.28 | 1.74 | 2.68 | 4.75 | 8.17 | 10.85 |
| <i>E</i> (W h kg <sup>-1</sup> )<br>Ni@NiCo <sub>2</sub> S <sub>2</sub>                               | 211  | 177  | 156  | 141  | 128  | 111  | 92   | 70   | 58    |
| <i>P<sub>av</sub></i> (kW kg <sup>-1</sup> )<br>Ni@NiCo <sub>2</sub> S <sub>2</sub>                   | 0.17 | 0.44 | 0.9  | 1.37 | 1.85 | 2.86 | 5.09 | 8.93 | 11.74 |
| <i>E</i> (W h kg <sup>-1</sup> )<br>Ni@Co <sub>9</sub> S <sub>8</sub>                                 | 130  | 114  | 100  | 88   | 81   | 68   | 49   | 33   | 26    |
| <i>P<sub>av</sub></i> (kW kg <sup>-1</sup> )<br>Ni@Co <sub>9</sub> S <sub>8</sub>                     | 0.16 | 0.4  | 0.81 | 1.23 | 1.66 | 2.57 | 4.51 | 8.00 | 11.03 |
